# Supplementary material for: Magnetic-field-induced vertical alignment of carbon nanotubes in Na 3 V 2 (PO 4 ) 2 F 3 with bulk dual-doping for high-rate sodium-ion batteries
Source: Royal Society of Chemistry journal article supplement (doi:10.1039/d5ta08529b), 2025-12-09
Supplement: d5ta08529b1.pdf [file d5ta08529b1.pdf]

## Supplementary information

### **Magnetic-field-induced vertical alignment of carbon nanotubes in $\text{Na}_3\text{V}_2(\text{PO}_4)_2\text{F}_3$ with bulk dual-doping for high-rate sodium-ion batteries**

Chen Wu <sup>a,c,d</sup>, Yuxing Xu <sup>a,d,\*</sup>, Jiechen Song <sup>a,c,d</sup>, Chunshan Wang <sup>a,c,d</sup>, Qiangqiang

Tan <sup>a,b,c,d,\*</sup>

<sup>a</sup> *State Key Laboratory of Mesoscience and Engineering, Institute of Process Engineering, Chinese Academy of Sciences, Beijing, 100190, China*

<sup>b</sup> *Center of Materials Science and Optoelectronics Engineering, University of Chinese Academy of Sciences, Beijing, 100049, China*

<sup>c</sup> *School of Chemical Engineering, University of Chinese Academy of Sciences, Beijing, 100049, China*

<sup>d</sup> *Hebei Engineering Research Center of Power and Energy Storage Battery Materials, Hebei Technology Innovation Center of Advanced Energy Materials, Hebei Manufacturing Industry Innovation Center of New Energy Materials and Key Equipment, Langfang Technological Service Center of Green Industry, Langfang, 065001, China*

**\* Corresponding authors:** Qiangqiang Tan, Yuxing Xu

*E-mail address:* [qtan@ipe.ac.cn](mailto:qtan@ipe.ac.cn), [yxxu@ipe.ac.cn](mailto:yxxu@ipe.ac.cn)

## 1. Supplementary Figures

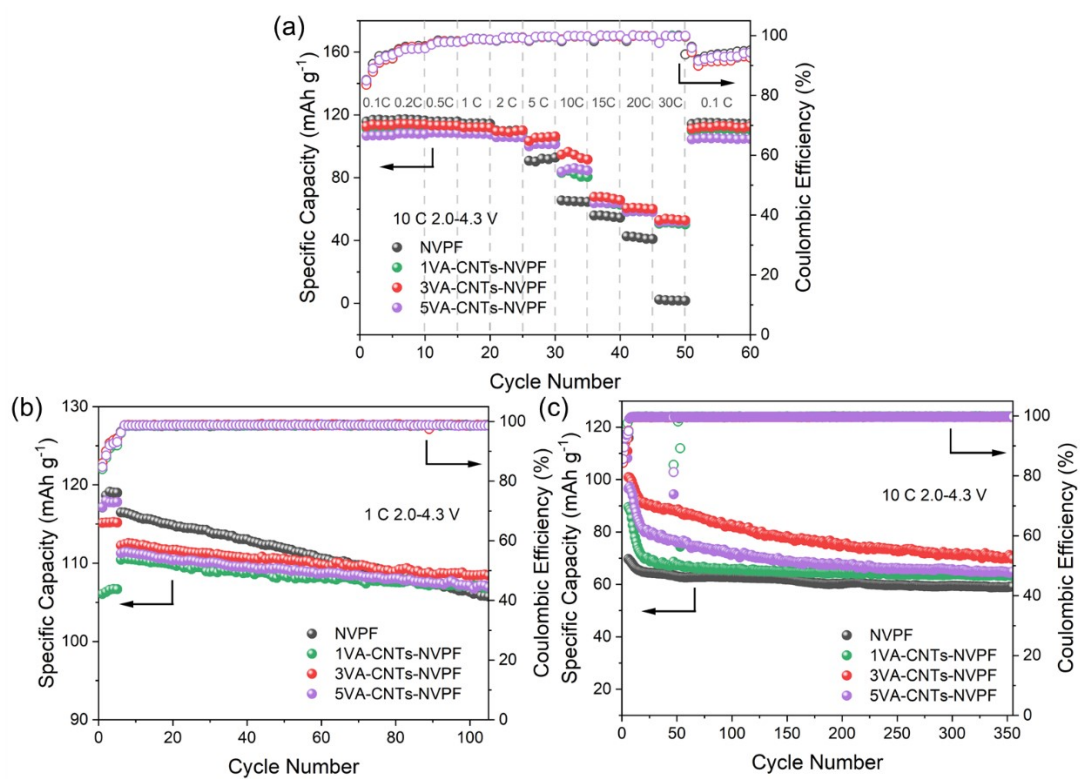

**Fig. S1 (a) Rate performance of  $x$ VA-CNTs-NVPF cathodes ( $x = 0$  wt.%, 1 wt.%, 3 wt.%, 5 wt.%). Cycling performance of  $x$ VA-CNTs-NVPF cathodes at (b) 1 C and (c) 10 C.**

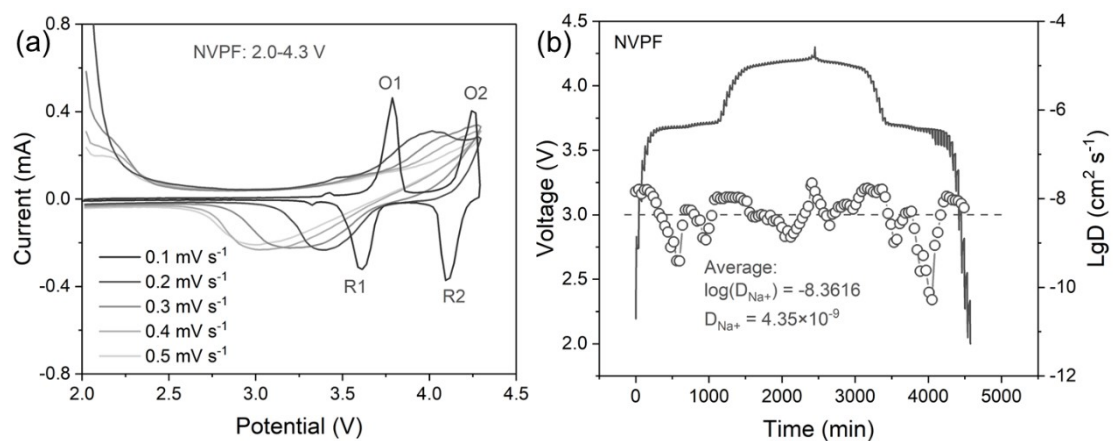

**Fig. S2 (a) CV curves of NVPF cathode at various scan rates. (b) GITT test and Na<sup>+</sup> diffusion coefficients of NVPF cathode.**

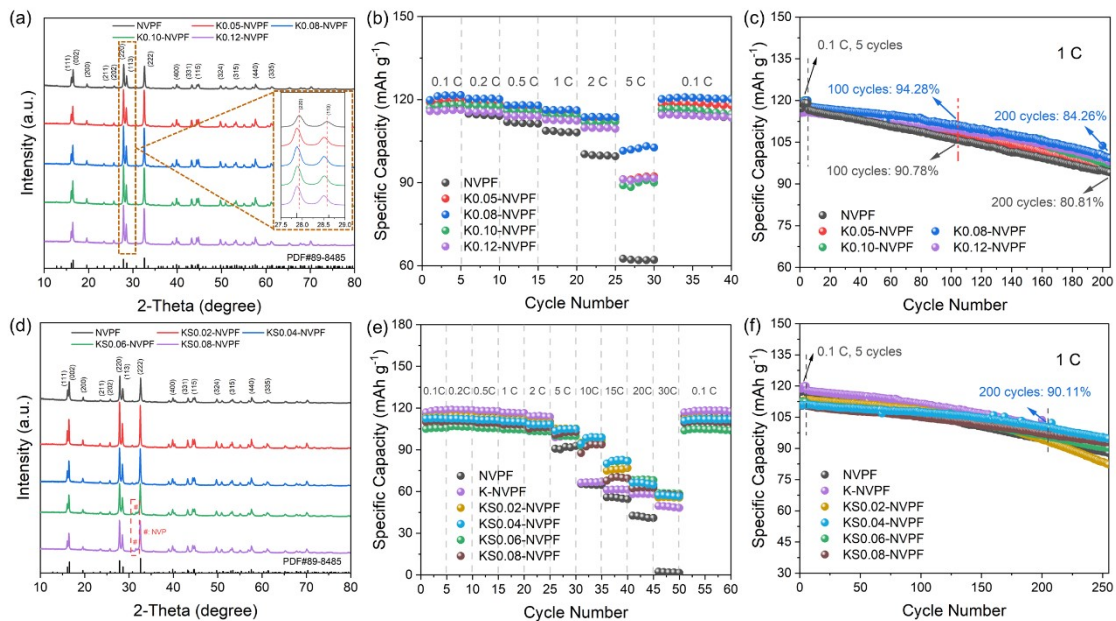

**Fig. S3 (a) XRD patterns of K<sub>x</sub>-NVPF materials ( $x = 0, 0.05, 0.08, 0.10, 0.12$ ). (b) Rate performance of K<sub>x</sub>-NVPF cathodes ( $x = 0, 0.05, 0.08, 0.10, 0.12$ ). (c) Cycling performance of K<sub>x</sub>-NVPF cathodes ( $x = 0, 0.05, 0.08, 0.10, 0.12$ ) at 1 C. (d) XRD patterns of K<sub>Sy</sub>-NVPF materials ( $y = 0, 0.02, 0.04, 0.06, 0.08$ ). (e) Rate performance of K<sub>Sy</sub>-NVPF cathodes ( $y = 0, 0.02, 0.04, 0.06, 0.08$ ). (f) Cycling performance of K<sub>Sy</sub>-NVPF cathodes ( $y = 0, 0.02, 0.04, 0.06, 0.08$ ) at 1 C.**

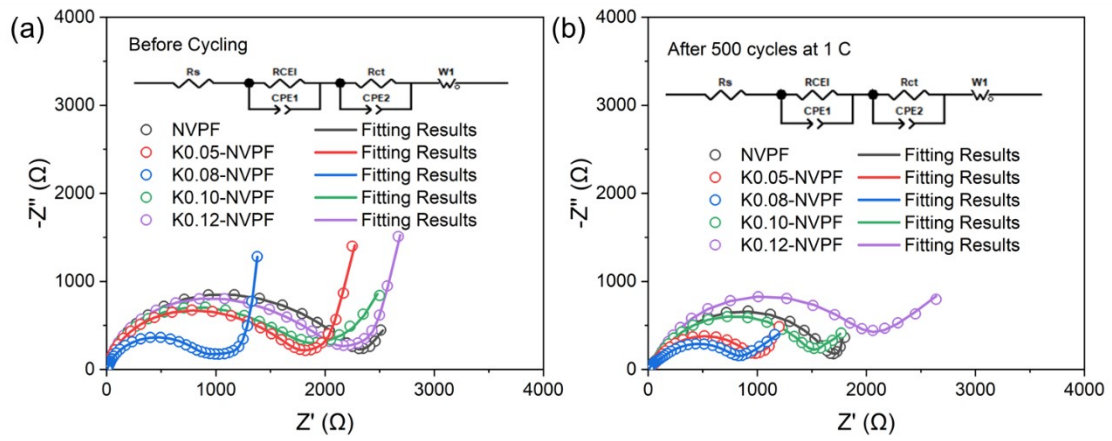

**Fig. S4** The Nyquist plots and fitting equivalent of K $x$ -NVPF ( $x = 0, 0.05, 0.08, 0.10, 0.12$ ) cathodes (a) before and (b) after 500 cycles at 1 C.

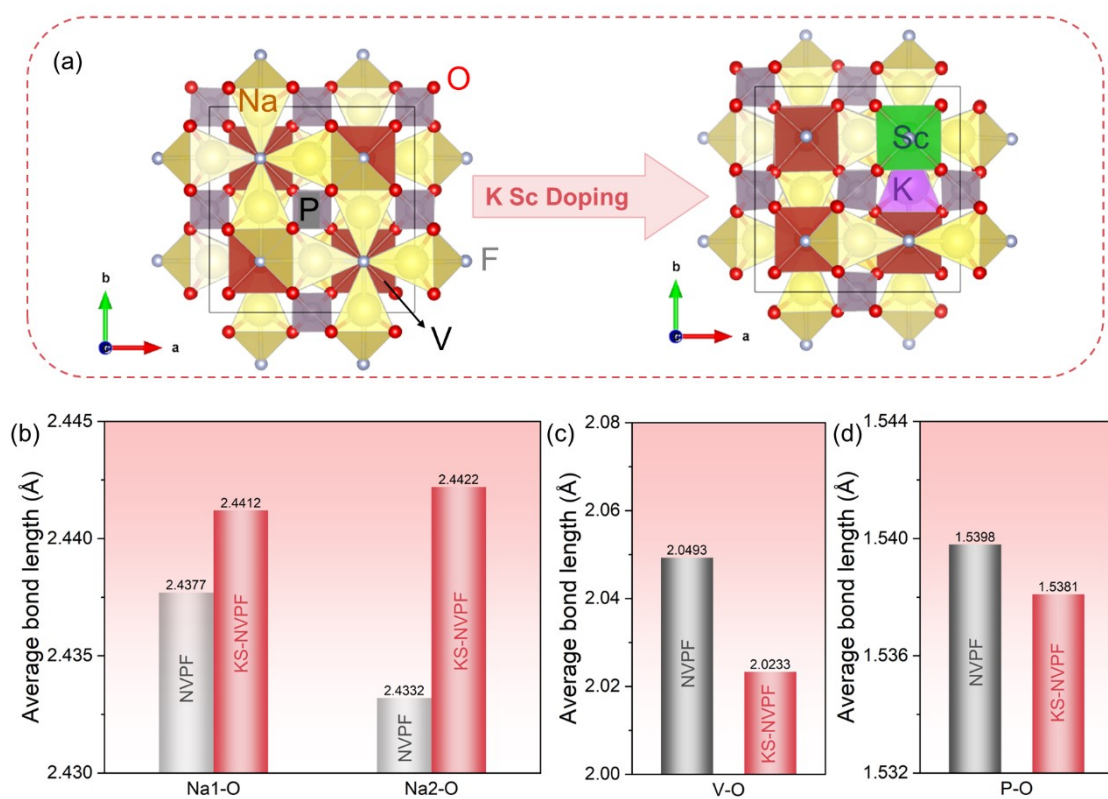

**Fig. S5 (a) Structural schematic diagram of NVPF and KS-NVPF. Bond length analysis results of (b) Na-O, (c) V-O, and (d) P-O bonds of NVPF and KS-NVPF.**

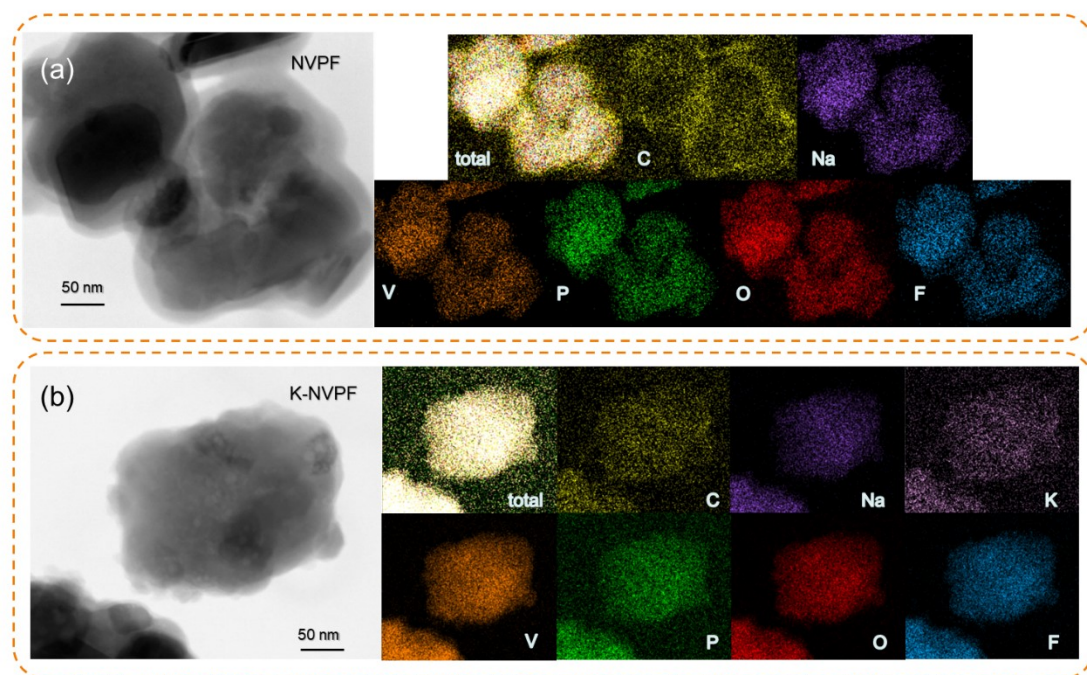

**Fig. S6 EDS elemental mapping images of (a) NVPF and (b) K-NVPF.**

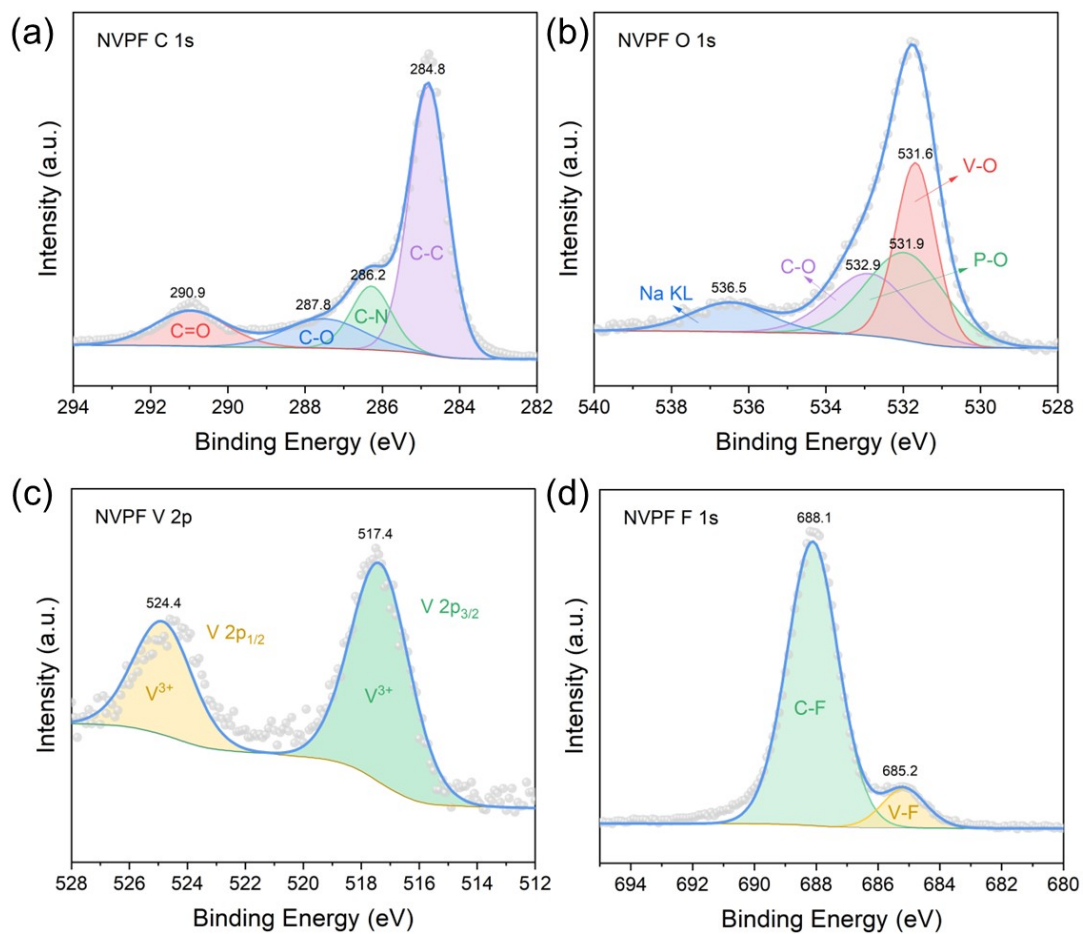

**Fig. S7 XPS spectra of (a) C 1s, (b) O 1s, (c) V 2p, and (d) F 1s of the NVPF.**



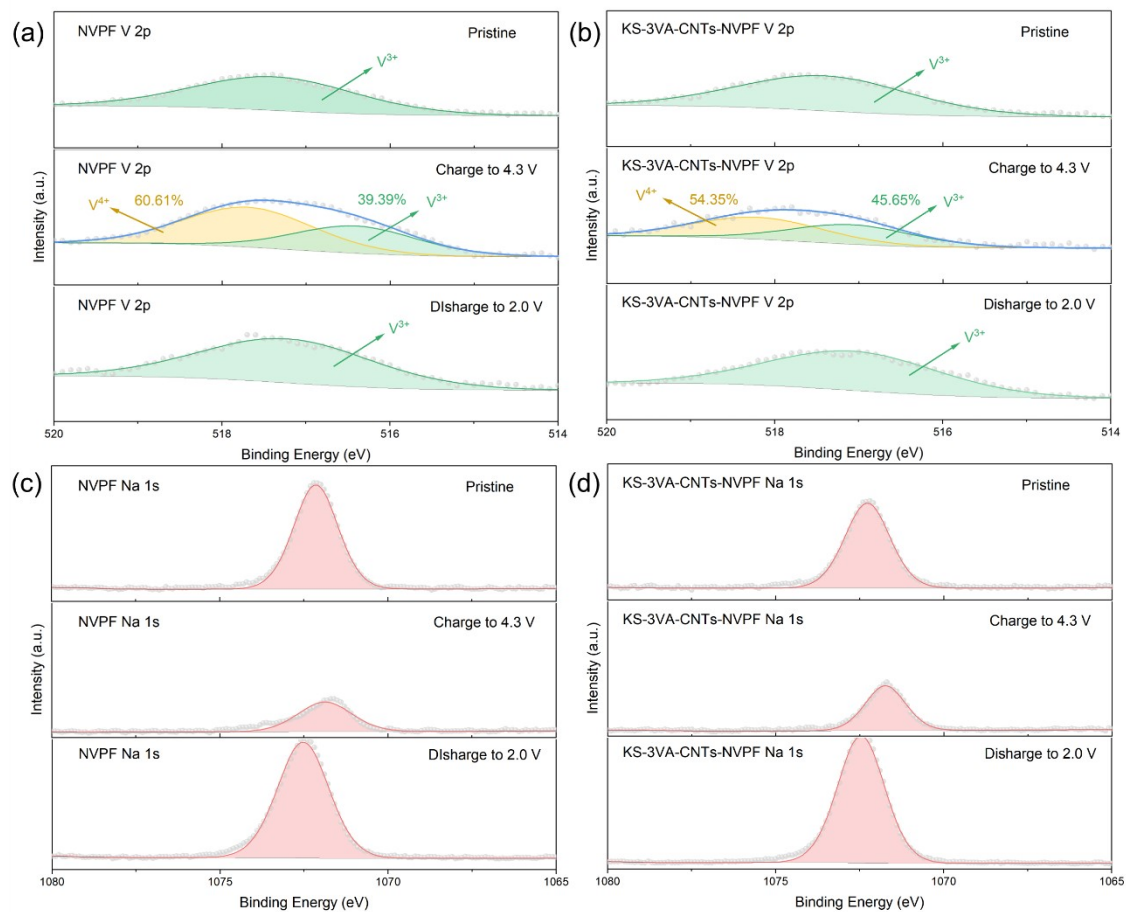

**Fig. S8 Ex-situ XPS spectra of the V element at different voltages of 0.1 C of (a) NVPF and (b) KS-3VA-CNTs-NVPF cathodes. Ex-situ XPS spectra of the Na element at different voltages of 0.1 C of (c) NVPF and (d) KS-3VA-CNTs-NVPF cathodes.**

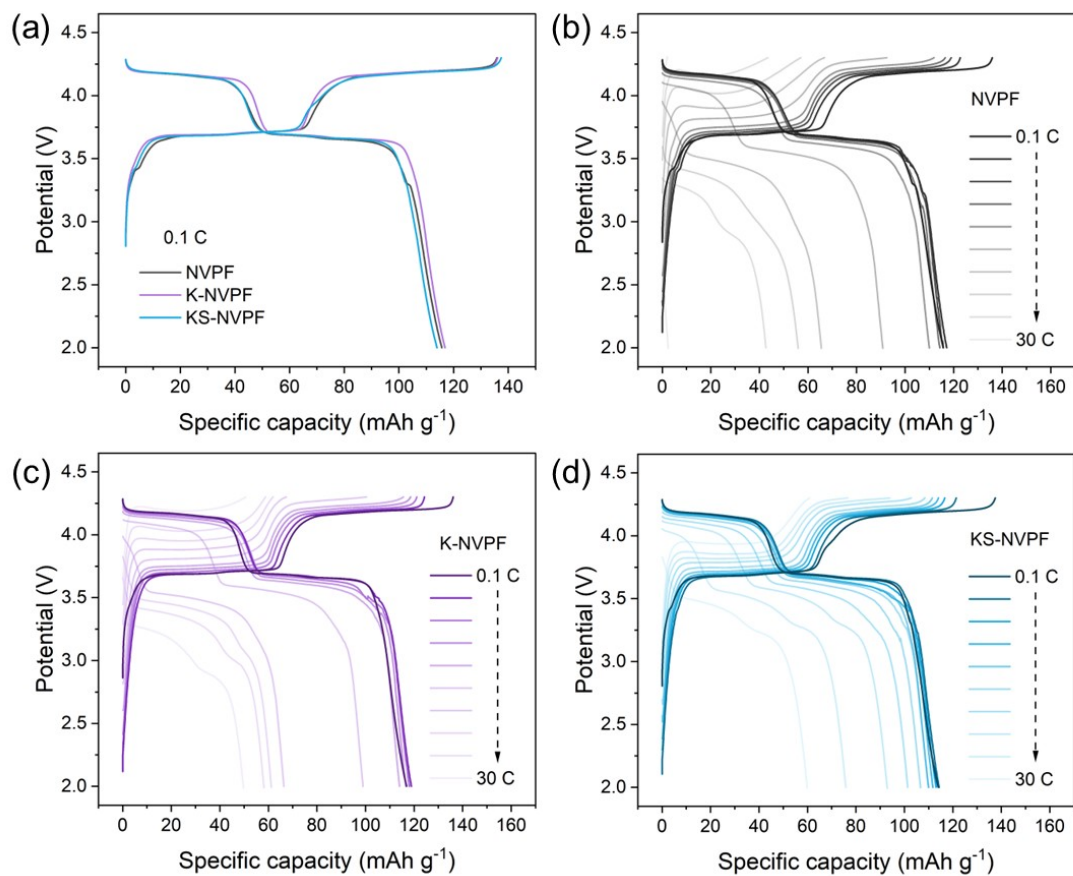

**Fig. S9 (a) The charge-discharge curves of NVPF, K-NVPF, and KS-NVPF at 0.1 C. The charge-discharge curves of (b) NVPF, (c) K-NVPF, and (d) KS-NVPF from 0.1 C to 30 C.**

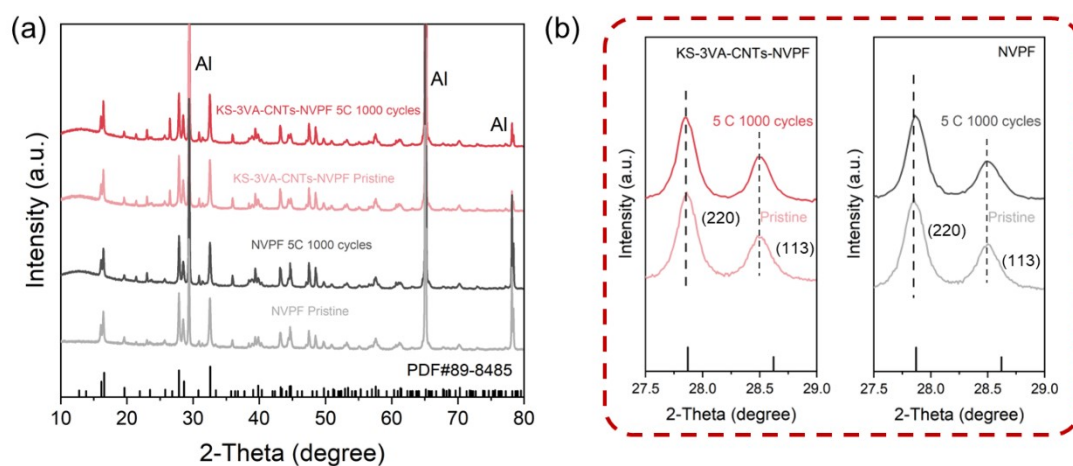

**Fig. S10 (a) The XRD patterns of KS-3VA-CNTs-NVPF and NVPF before and after 1000 cycles at 5 C. (b) The enlarged patterns of the (220) and (113) peaks.**

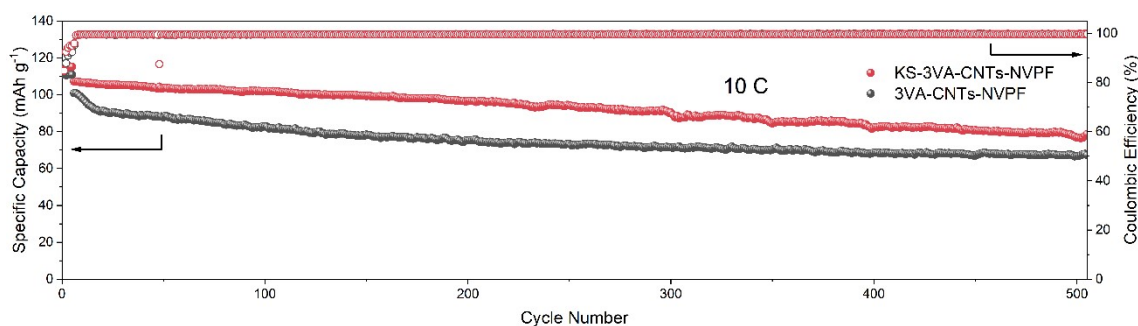

**Fig. S11 Cycling performance of 3VA-CNTs-NVPF and KS-3VA-CNTs-NVPF at 10 C.**

**Supplementary Discussion 1:** It is noteworthy that, as observed in Figs. 2a and 7a, the rate performance of 3VA-CNTs-NVPF and KS-3VA-CNTs-NVPF appears nearly identical, and both of them exhibit comparable specific capacities under extremely high current densities. This outstanding performance under high-rate conditions is primarily attributed to the critical role of the VA-CNTs conductive network in facilitating rapid electron transport and ionic diffusion, which is a common characteristic shared by the above two cathodes. However, the key contribution of K/Sc co-doping lies not in further enhancing the ultimate rate performance beyond the effect of VA-CNTs, but rather in improving the intrinsic ionic and electronic conductivity of the material (Fig. 3h and Figs. 6a-i). This ensures the structural and interfacial stability of the bulk material during high-rate cycling, thereby promoting the stable retention of high-rate performance. To further illustrate the role of K and Sc in rate enhancement, a comparison of the long-term cycling stability between KS-3VA-CNTs-NVPF and the undoped 3VA-CNTs-NVPF at 10 C reveals that although both cathodes exhibit comparable initial capacities, the undoped cathode demonstrates significantly faster capacity decay (Fig. S11). In contrast, the K/Sc co-doped cathode exhibits markedly enhanced capacity retention, indicating that K/Sc co-doping effectively improves the intrinsic ionic and electronic conductivity of the material and stabilizes the crystal structure, thereby substantially mitigating capacity degradation. This conclusion is further supported by the excellent cycling stability of KS-3VA-CNTs-NVPF at 5 C and 30 C cycling tests (Figs. 7d and e). As for the rate performance at high rate, the KS-NVPF cathode obviously delivers more stable and higher capacity at high rates than the undoped NVPF cathodes in Fig. 7a. This also confirms the key role of K and Sc in rate enhancement, which is consistent with the results of the above high-rate cycling test. Additionally, comparative electrochemical studies of NVPF, K-NVPF, and KS-NVPF materials without VA-CNTs demonstrate that the introduction of K and Sc leads to more stable cathode reaction kinetics (Figs. 6a-f), enhanced bulk ionic diffusion rates (Figs. 6g-i), and improved electronic conductivity (Fig. 3h and Figs. 7f and g). In summary, while the VA-CNTs promote rapid ion and electron transport at the electrode scale, enabling excellent rate performance in both cathodes, the K/Sc co-doping also promotes the rate enhancement of cathodes by improving the intrinsic ionic and electronic conductivity within the material. This ensures structural and interfacial stability during high-rate cycling, thereby achieving better long-term cycling stability.

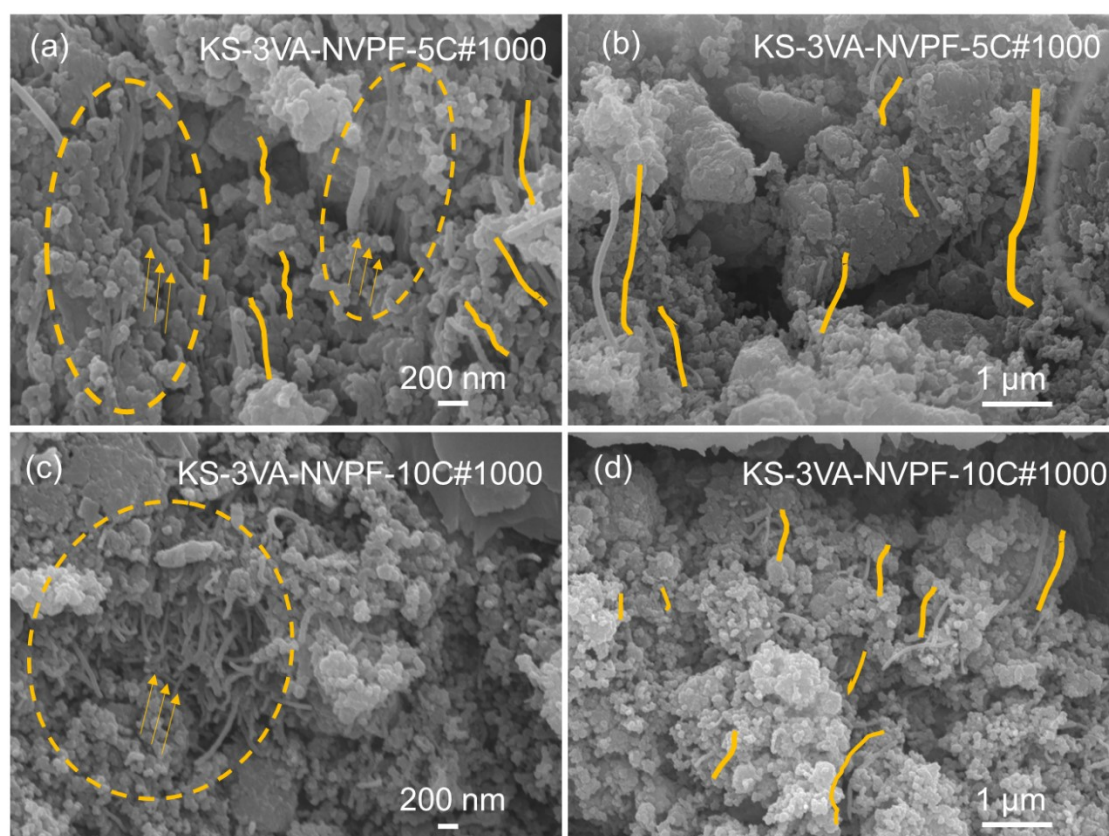

**Fig. S12 SEM images of the cross section of the KS-3VA-CNTs-NVPF cathode after 1000 cycles at (a-b) 5 C and (c-d) 10 C.**

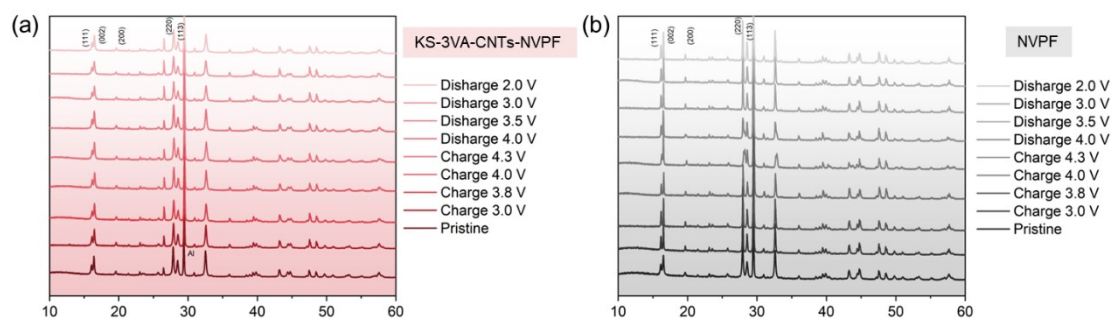

**Fig. S13** The ex-situ XRD patterns of (a) KS-3VA-CNTs-NVPF and (b) NVPF cathodes during the first cycle at 0.1 C.



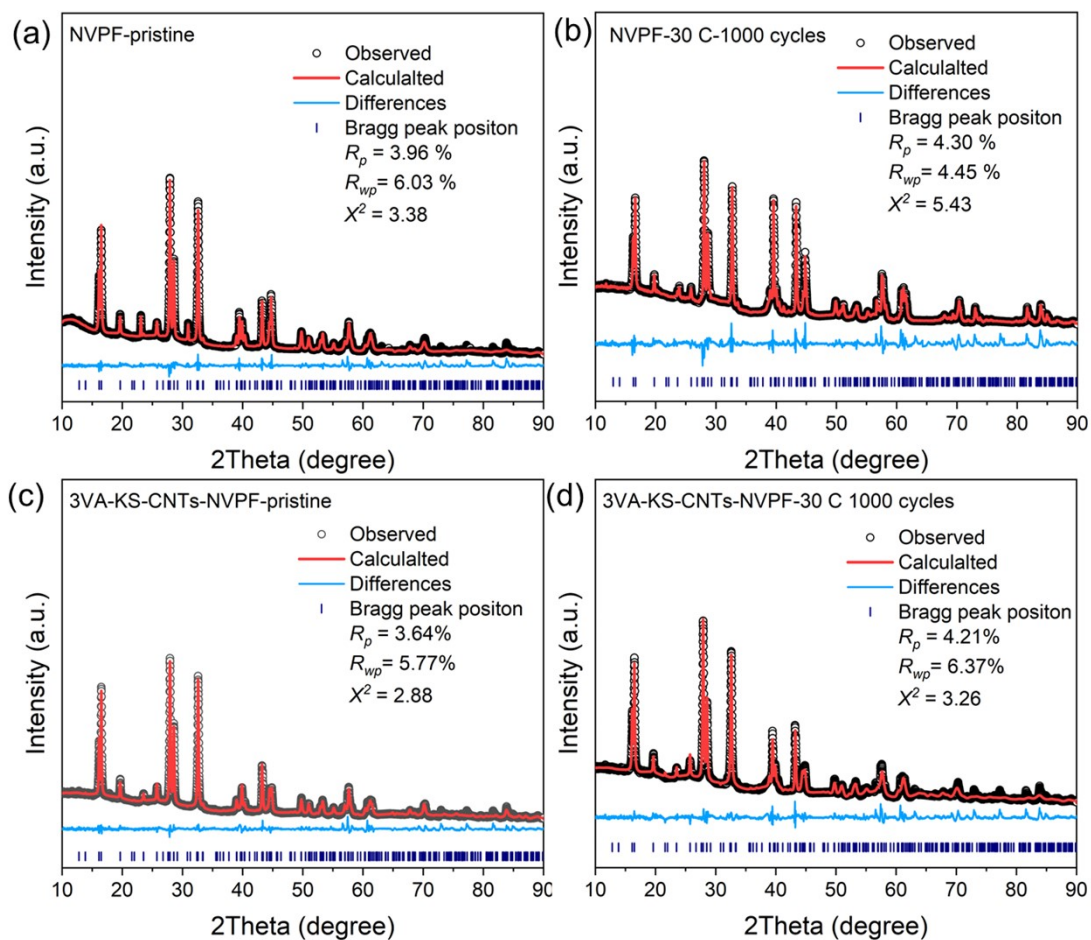

**Fig. S14** Rietveld refinements of (a-b) NVPF and (c-d) KS-NVPF cathodes before and after 1000 cycles at 30 C.

## 2. Supplementary Tables

**Table S1. EIS fitting results of the NVPF, 3R-CNTs-NVPF, and 3VA-CNTs-NVPF before cycling and after 500 cycles at 1 C.**

| Factor                  |                             | NVPF  | 3R-CNTs-NVPF | 3VA-CNTs-NVPF |
|-------------------------|-----------------------------|-------|--------------|---------------|
| Pristine                | $R_{\text{CEI}} (\Omega)$   | 1388  | 1225         | 720.8         |
|                         | $R_{\text{ct}} (\Omega)$    | 917.8 | 798.0        | 745.9         |
|                         | $R_{\text{total}} (\Omega)$ | 2309  | 2027         | 1471          |
| After 500 cycles at 1 C | $R_{\text{CEI}} (\Omega)$   | 83.47 | 64.04        | 54.63         |
|                         | $R_{\text{ct}} (\Omega)$    | 1503  | 466.6        | 420.5         |
|                         | $R_{\text{total}} (\Omega)$ | 1576  | 530.6        | 479.7         |



**Table S2. EIS fitting results of the Kx-NVPF ( $x = 0, 0.05, 0.08, 0.10, 0.12$ ) before cycling and after 500 cycles at 1 C.**

| Factor                     |                             | NVPF  | K0.05-<br>NVPF | K0.08-<br>NVPF | K0.10-<br>NVPF | K0.12-<br>NVPF |
|----------------------------|-----------------------------|-------|----------------|----------------|----------------|----------------|
| Pristine                   | $R_{\text{CEI}} (\Omega)$   | 1388  | 862.0          | 835.8          | 871.9          | 1072           |
|                            | $R_{\text{ct}} (\Omega)$    | 917.8 | 795.7          | 444.1          | 781.4          | 929.6          |
|                            | $R_{\text{total}} (\Omega)$ | 2309  | 1664           | 1285           | 1653           | 2006           |
| After 500<br>cycles at 1 C | $R_{\text{CEI}} (\Omega)$   | 83.47 | 58.44          | 88.49          | 67.64          | 60.06          |
|                            | $R_{\text{ct}} (\Omega)$    | 1503  | 864.5          | 656.2          | 1377           | 1783           |
|                            | $R_{\text{total}} (\Omega)$ | 1576  | 928.4          | 750.8          | 1450           | 1847           |

**Table S3. Lattice parameters of NVPF, K-NVPF, and KS-NCPF.**

| Sample  | a (Å)       | b (Å)       | c (Å)        | Volume (Å <sup>3</sup> ) |
|---------|-------------|-------------|--------------|--------------------------|
| NVPF    | 9.03586(19) | 9.03586(19) | 10.74617(17) | 877.39(5)                |
| K-NVPF  | 9.04032(8)  | 9.04032(8)  | 10.75664(10) | 879.112(15)              |
| KS-NVPF | 9.03676(9)  | 9.03676(9)  | 10.74943(12) | 877.831(18)              |

**Table S4. Refined structural parameters of NVPF, K-NVPF, and KS-NVPF.**

| Sample  | Atom | Site | x       | y       | z       | Occupancy | Uiso    |
|---------|------|------|---------|---------|---------|-----------|---------|
| NVPF    | Na1  | 8i   | 0.52816 | 0.23128 | 0.00000 | 1.00000   | 0.02530 |
|         | Na2  | 8i   | 0.81900 | 0.07509 | 0.00000 | 0.50000   | 0.04390 |
|         | V1   | 8j   | 0.25006 | 0.25006 | 0.18646 | 1.00000   | 0.00690 |
|         | P1   | 4d   | 0.00000 | 0.50000 | 0.25000 | 1.00000   | 0.00080 |
|         | P2   | 4e   | 0.00000 | 0.00000 | 0.26032 | 1.00000   | 0.02920 |
|         | O1   | 16k  | 0.09295 | 0.40076 | 0.16210 | 1.00000   | 0.01580 |
|         | O2   | 8j   | 0.09142 | 0.09142 | 0.16477 | 1.00000   | 0.00310 |
|         | O3   | 8j   | 0.39930 | 0.39930 | 0.16220 | 1.00000   | 0.00090 |
|         | F1   | 4f   | 0.23456 | 0.23456 | 0.00000 | 1.00000   | 0.01990 |
|         | F2   | 8j   | 0.24674 | 0.24674 | 0.36542 | 1.00000   | 0.01360 |
| K-NVPF  | Na1  | 8i   | 0.52471 | 0.22792 | 0.00000 | 0.96500   | 0.03070 |
|         | Na2  | 8i   | 0.80925 | 0.06398 | 0.00000 | 0.48500   | 0.04490 |
|         | K1   | 8i   | 0.52471 | 0.22792 | 0.00000 | 0.03500   | 0.03070 |
|         | K2   | 8i   | 0.80925 | 0.00000 | 0.00000 | 0.01500   | 0.04490 |
|         | V1   | 8j   | 0.25081 | 0.25081 | 0.18639 | 1.00000   | 0.00990 |
|         | P1   | 4d   | 0.00000 | 0.50000 | 0.25000 | 1.00000   | 0.01000 |
|         | P2   | 4e   | 0.00000 | 0.00000 | 0.26068 | 1.00000   | 0.01960 |
|         | O1   | 16k  | 0.09695 | 0.39873 | 0.16514 | 1.00000   | 0.01910 |
|         | O2   | 8j   | 0.08709 | 0.08709 | 0.16597 | 1.00000   | 0.00460 |
|         | O3   | 8j   | 0.40350 | 0.40350 | 0.15982 | 1.00000   | 0.00020 |
|         | F1   | 4f   | 0.23692 | 0.23692 | 0.00000 | 1.00000   | 0.01850 |
|         | F2   | 8j   | 0.24575 | 0.24575 | 0.36443 | 1.00000   | 0.00610 |
| KS-NVPF | Na1  | 8i   | 0.52701 | 0.23508 | 0.00000 | 0.96390   | 0.02970 |
|         | Na2  | 8i   | 0.82256 | 0.09064 | 0.00000 | 0.48610   | 0.05660 |
|         | K1   | 8i   | 0.52701 | 0.23508 | 0.00000 | 0.03610   | 0.02970 |
|         | K2   | 8i   | 0.82256 | 0.09064 | 0.00000 | 0.01390   | 0.05660 |
|         | V1   | 8j   | 0.24872 | 0.24872 | 0.18635 | 0.98190   | 0.00950 |
|         | Sc   | 8j   | 0.24872 | 0.24872 | 0.18635 | 0.01810   | 0.00950 |
|         | P1   | 4d   | 0.00000 | 0.50000 | 0.25000 | 1.00000   | 0.04260 |
|         | P2   | 4e   | 0.00000 | 0.00000 | 0.25256 | 1.00000   | 0.00760 |
|         | O1   | 16k  | 0.09338 | 0.40054 | 0.16306 | 1.00000   | 0.00340 |
|         | O2   | 8j   | 0.09012 | 0.09012 | 0.16068 | 1.00000   | 0.02760 |
|         | O3   | 8j   | 0.40082 | 0.40082 | 0.15985 | 1.00000   | 0.00730 |
|         | F1   | 4f   | 0.23770 | 0.23770 | 0.00000 | 1.00000   | 0.01570 |
|         | F2   | 8j   | 0.24171 | 0.24171 | 0.36575 | 1.00000   | 0.02190 |

**Table S5. EIS fitting results of the NVPF, K-NVPF, KS-NVPF, and KS-3VA-CNTs-NVPF before cycling and after 500 cycles at 1 C.**

| Factor                  |                             | NVPF  | K-NVPF | KS-NVPF | KS-3VA-CNTs-NVPF |
|-------------------------|-----------------------------|-------|--------|---------|------------------|
| Pristine                | $R_{\text{CEI}} (\Omega)$   | 1388  | 835.8  | 687.7   | 530.4            |
|                         | $R_{\text{ct}} (\Omega)$    | 917.8 | 444.1  | 326.6   | 127.5            |
|                         | $R_{\text{total}} (\Omega)$ | 2309  | 1285   | 1018    | 662.5            |
| After 500 cycles at 1 C | $R_{\text{CEI}} (\Omega)$   | 83.47 | 88.49  | 23.04   | 8.082            |
|                         | $R_{\text{ct}} (\Omega)$    | 1503  | 656.2  | 462.9   | 222.0            |
|                         | $R_{\text{total}} (\Omega)$ | 1576  | 750.8  | 490.6   | 234.2            |

**Supplementary Discussion 2:** It is worth noting that the "contradiction" between the relatively large total impedance value of the battery under initial conditions and its satisfactory high-rate performance can be explained by the following reasons:

As can be observed from Fig. 7f and Table S5, the large impedance observed in the Nyquist plots of various materials before cycling is primarily attributed to the interfacial resistance ( $R_{\text{CEI}}$ ). This is because the cathode-electrolyte interphase (CEI) layer on the cathode surface is not yet stabilized during the initial cycles, and its unstable structural change leads to a higher  $R_{\text{CEI}}$ . This resistance dominates in the intermediate frequency range typically measured by EIS, which reflects the energy barrier for  $\text{Na}^+$  immigration across the electrode-electrolyte interface under near-equilibrium conditions in the initial state.<sup>1, 2</sup> However, the interface resistance is no longer the dominant element when cycling at high rates. Specifically, electrode reactions under high-rate cycling are generally non-equilibrium processes with increased polarization. Under such conditions, the driving force (overpotential) is relatively high. Therefore, although the interfacial resistance  $R_{\text{CEI}}$  exists, the charge transfer resistance ( $R_{\text{ct}}$ ) reflecting electrode reactions is actually the dominant element in this situation.<sup>3, 4</sup> For the KS-3VA-CNTs-NVPF material, the  $R_{\text{ct}}$  before cycling is 127.5  $\Omega$ , which is competitive compared to other similar materials,<sup>3-11</sup> and it only increases to 222.0  $\Omega$  after 500 cycles at 1 C, exhibiting high ionic and electronic transport abilities within the cathode. These bulk material characteristics can further enable sodium ions and electrons to be transported rapidly once the stable CEI layer is established (Fig. 7g and Table S5), allowing the cathode to exhibit satisfactory high-rate performance (Figs. 7a, 7d-e).

Therefore, this seemingly "contradictory" phenomenon arises because the EIS test sensitively captures the interfacial-limited kinetics of the battery under equilibrium conditions in the initial state, whereas the high-rate performance of KS-3VA-CNTs-NVPF is collectively determined by the rapid bulk transport kinetics under high-polarization conditions and the stabilization of the CEI layer after cycling.

**Table S6. Electrochemical performance of the KS-3VA-CNTs-NVPF cathode compared to that of other related cathodes.**

| Cathode materials | Modification measures | Rate performance                      | Capacity retention (%)                                                   | Ref.        |
|-------------------|-----------------------|---------------------------------------|--------------------------------------------------------------------------|-------------|
| NVPF-Mg05         | Mg                    | 10 C: 96.6 mAh g <sup>-1</sup>        | 69.4<br>(1000 cycles, 10 C)                                              | 9           |
| Fe0.1-NVPF@N-CNTs | Fe, CNTs              | 10 C: 35 mAh g <sup>-1</sup>          | 74.53<br>(1000 cycles, 2 C)                                              | 4           |
| NVPF@NC-Cu0.06    | Cu, N-C               | 10 C: 99 mAh g <sup>-1</sup>          | 94<br>(500 cycles, 10 C)                                                 | 5           |
| NVPF@N-3          | N-C                   | 10 C: 102.6 mAh g <sup>-1</sup>       | 96.5<br>(100 cycles, 1 C)                                                | 12          |
| NVMPF             | Fe, Ni, Co, Mg, Cr    | 10 C: 114 mAh g <sup>-1</sup>         | 94.6<br>(200 cycles, 10 C)                                               | 13          |
| K0.10-NVPF        | K                     | 10 C: 90.6 mAh g <sup>-1</sup>        | 97.5<br>(500 cycles, 1 C)                                                | 6           |
| NVPF@C@CMC-2      | CMC                   | 10 C: 83.2 mAh g <sup>-1</sup>        | 74<br>(500 cycles, 10 C)                                                 | 10          |
| KS-3VA-CNTs-NVPF  | K, Sc, VA-CNTs        | <b>10 C: 100.1 mAh g<sup>-1</sup></b> | <b>90.33</b><br>(500 cycles, 5 C)<br><b>75.94</b><br>(1000 cycles, 30 C) | (This work) |

**Table S7. Summary of data on the lattice parameters of NVPF and KS-3VA-CNTs-NVPF cathodes before and after 1000 cycles at 30 C obtained by XRD Rietveld refinement.**

| Sample                    | a (Å)      | b (Å)      | c (Å)       | Volume (Å <sup>3</sup> ) |
|---------------------------|------------|------------|-------------|--------------------------|
| NVPF-pristine             | 9.0376(7)  | 9.0376(7)  | 10.7449(5)  | 877.62(16)               |
| NVPF-30 C                 | 9.0005(10) | 9.0005(10) | 10.6720 (6) | 864.52 (14)              |
| KS-3VA-CNTs-NVPF-pristine | 9.0419(5)  | 9.0419(5)  | 10.7490(4)  | 878.80(12)               |
| KS-3VA-CNTs-NVPF-30 C     | 9.0391(13) | 9.0391(13) | 10.7567(10) | 878.88(31)               |

## References

1. A. Chahbaz, M. Schreiber, J. Rinner, J. M. Hinojosa, G. Stahl, M. Lienkamp and D. U. Sauer, *Cell Rep. Phys. Sci.*, 2025, **6**, 102654.
2. W. Waag, S. Käbitz and D. U. Sauer, *Appl. Energy*, 2013, **102**, 885-897.
3. S. Guo, J. Peng, N. Sharma, J. Pan, Y. Liao, X. An, H. Li, Z. Ge, C. Zhou, W. L. Tan and J. Liu, *Chem. Mater.*, 2025, **37**, 1500-1512.
4. J. Yang, N. Liu, G. Jiang, W. Sheng, X. Zheng, Z. Bai and X. Jiang, *Chem. Eng. J.*, 2024, **485**, 149834.
5. Q. Zhou, Y. Wang, R. Ou, X. Ding, Y. Xin, F. Wu and H. Gao, *Small*, 2024, **20**, 2310699.
6. J. Zhang, Y. Lai, P. Li, Y. Wang, F. Zhong, X. Feng, W. Chen, J. Liu, X. Ai, H. Yang and Y. Cao, *Green Energy Environ.*, 2022, **7**, 1253-1262.
7. B. Wang, J. Zhang, Y. Zhao, M. Zhang, L. Guo and Y. Chen, *Energy Storage Mater.*, 2025, **82**, 104661.
8. D. A. Puspitasari, J. Patra, I. M. Hung, D. Bresser, T.-C. Lee and J.-K. Chang, *ACS Sustainable Chem. Eng.*, 2021, **9**, 6962-6971.
9. Y. Zhang, Y. Hu, T. Feng, Z. Xu and M. Wu, *J. Power Sources*, 2024, **602**, 234337.
10. K. Liang, H. Zhao, J. Li, X. Huang and Y. Ren, *Appl. Surf. Sci.*, 2023, **615**, 156412.
11. X. Wang, Q. Wang, J. Zhang, Y. Ma, M. Huang and X. Liu, *J. Energy Chem.*,

2025, **102**, 365-376.

12. G.-d. Yi, C.-l. Fan, Z. Hu, W.-h. Zhang, S.-c. Han and J.-s. Liu, *Electrochim. Acta*, 2021, **383**, 138370.
13. M. Sun, Y. Sun, H. Ma, S. Wang, Q. Liu, G. Zhao, L. Duan, Q. Hu, Q. An, K. Zeng, W. Huang, X. Zou, Y. Yang and H. Guo, *ACS Nano*, 2025, **19**, 18386-18396.
